# Supplementary material
Source: PubMed Central journal article supplement (PMC1750910)
Supplement: pnas_0609140103_1.pdf [file pnas_0609140103_1.pdf]

**TM1**

hGPAT3 MEGAELAGKILSTWLT~~LV~~LGFI~~LL~~PSVFGVSLGISEI**Y**MKILVKTLEWAT**T**IRIEKGT**P**KPE  
 mGPAT3 MEGADLAVKLLSTWLT~~LV~~VGGI~~LL~~PSAFGLSLGISEI**Y**MKILVKTLEWAT**T**LRIQKGAPKE  
 \*\*\*\*:\* \*:\*:\*\*\*\*\* \*:\*\*\*\*\*.\*\*:\*\*\*\*\*:\*\*\*:\*:\*\*\*

hGPAT3 SILKNSASVGI IQRDE**S**PMEKGL**S**GLRGRDFELSDV**F****Y****F**SKKGLEAIVEDEV**T**QRF**S**SEE  
 mGPAT3 SALKNSASVGI IQRDE**S**PMEKGL**S**GLRGRDFELSDV**F****Y****F**SKKGLEAIVEDEV**T**QRF**S**SEE  
 \* \*\*\*\*\*

**TM2**

hGPAT3 LVSWNLLTRTNVNFQ**Y**ISLRL**T**MVWVLGVIVRYCVLLPLRVTLAFIGISLLVIGTTLVGQ  
 mGPAT3 LVSWNLLTRTNVNFQ**Y**ISPR**L****T**MVWVLGVLVRYCFLPLRVTLAFIGISLLIIGTTLVGQ  
 \*\*\*\*\* :\*\*\*\*\*.\*\*:\*\*\*\*\*:\*\*\*\*\*

hGPAT3 LPDS**S**LKNWLSELVHLTCCRICVRAL**S**GTIHYHNKQYRPQKGGICVANHT**S**PIDVLILTT  
 mGPAT3 LPDS**S**LKNWLSELVHLTCCRICVR**S**L**S**GTIHYHNKQYRPQKGGICVANHT**S**PIDVLILAT  
 \*\*\*\*\* :\*\*\*\*\*.\*\*:\*\*\*\*\*:\*\*\*\*\*

hGPAT3 DGC**Y**AMVGQVHGGLMGIIQRAMVKACPHVWFERSEMKDRHLV**T**KRLKEHIADKKKLPIILI  
 mGPAT3 DGC**Y**AMVGQVHGGLMGIIQRAMVKACPHVWFERSEIKDRHLV**T**KRLKEHIADKKKLPIILI  
 \*\*\*\*\* :\*\*\*\*\*.\*\*:\*\*\*\*\*:\*\*\*\*\*

hGPAT3 FPEGTCI**N**NTSVMMF**K**KG**S**FEIGGTIHPVAIKYNPQFGDAFWNSS**K**YNMVSYLLRM**M**TSW  
 mGPAT3 FPEGTCI**N**NTSVMMF**K**KG**S**FEIGGTIYPVAIKYNPQFGDAFWNSS**K**YNLVSYLLR**I**M**T**SW  
 \*\*\*\*\* :\*\*\*\*\*.\*\*:\*\*\*\*\*:\*\*\*\*\*

hGPAT3 AIVCDVWYMP**P****T**REEGEDAVQFANRVK**S**AIAIQGGLTELPWDGGLKRAKVKDIFKEEQQ  
 mGPAT3 AIVCDVWYMP**P****T**REEGEDAVQFANRVK**S**AIAVQGGLTELPWDGGLKRAKVKDTFKEEQQ  
 \*\*\*\*\* :\*\*\*\*\*.\*\*:\*\*\*\*\*:\*\*\*\*\*

hGPAT3 KNYSKMI**V**NGSLS ----  
 mGPAT3 KNYSKMI**V**NGSP**N**LARD  
 \*\*\*\*\* .
