# Supplementary material
Source: PubMed Central journal article supplement (PMC1750910)

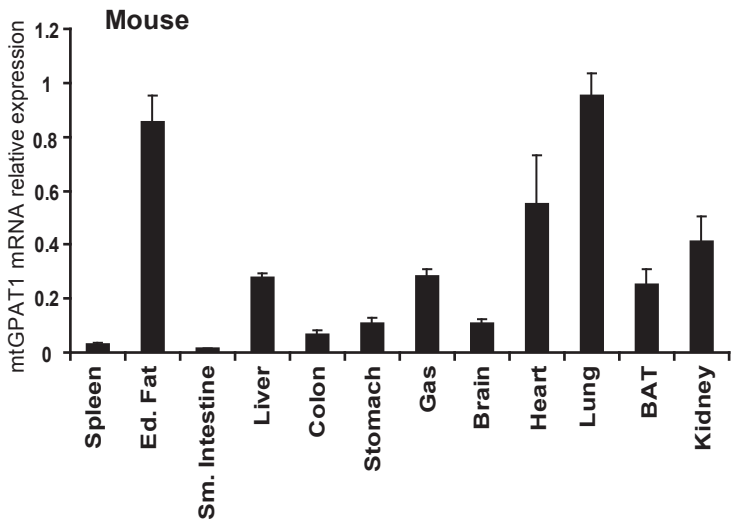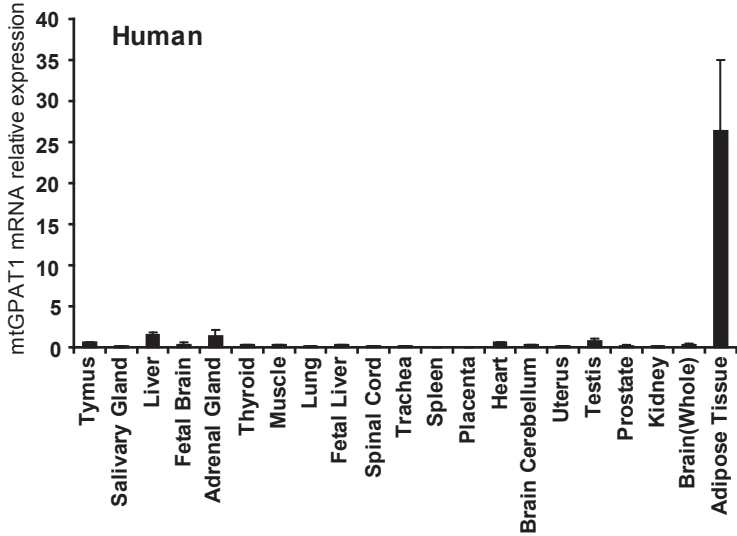

Supplement: pnas_0609140103_2.pdf [file pnas_0609140103_2.pdf]

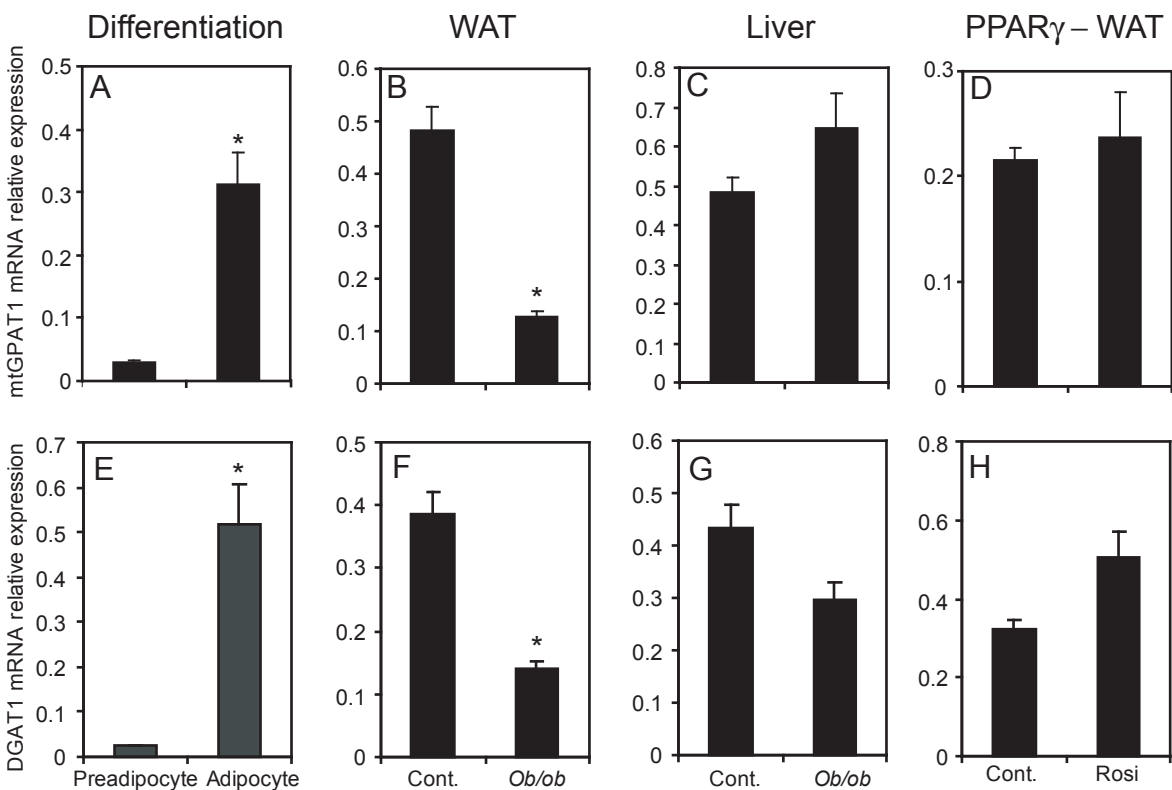

Supplement: pnas_0609140103_3.pdf [file pnas_0609140103_3.pdf]
